# Supplementary material for: Highly sensitive electrochemical sensor for dopamine with a double-stranded deoxyribonucleic acid/gold nanoparticle/graphene modified electrode
Source: Royal Society of Chemistry journal article supplement (doi:10.1039/c4ay03008g), 2015-01-01
Supplement: c4ay03008g1.pdf [file c4ay03008g1.pdf]

## Highly sensitive electrochemical sensor for dopamine with a double-stranded deoxyribonucleic acid/gold nanoparticle/graphene modified electrode

Wencheng Wang<sup>a</sup>, Yong Cheng<sup>b</sup>, Lijun Yan<sup>a</sup>, Huanhuan Zhu<sup>b</sup>, Guangjiu Li<sup>b\*</sup>, Jing Li<sup>a</sup>, Wei Sun<sup>a\*</sup>

<sup>a</sup>College of Chemistry and Chemical Engineering, Hainan Normal University, Haikou 571158, China; <sup>b</sup>College of Chemistry and Molecular Engineering, Qingdao University of Science and Technology, Qingdao 266042, China

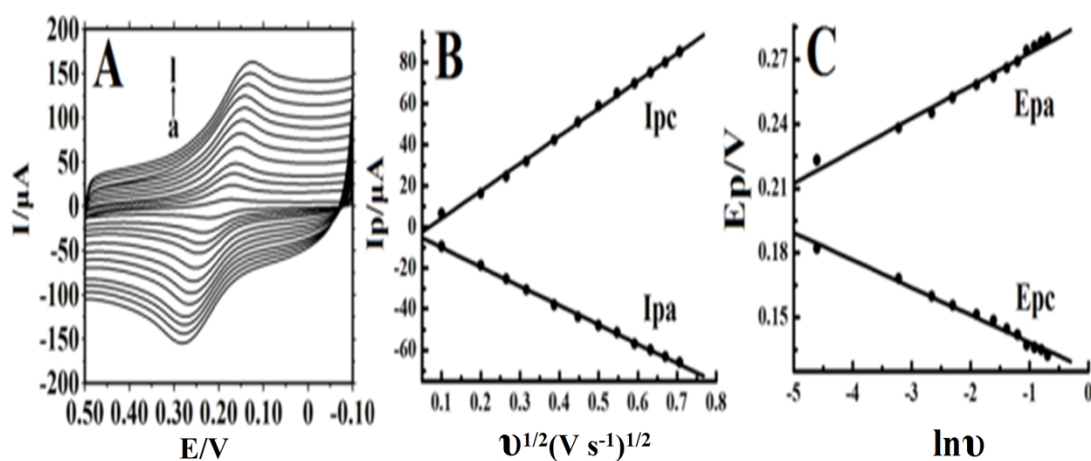

Fig. S1 (A) Cyclic voltammograms of  $1.0 \times 10^{-4} \text{ mol L}^{-1}$  DA with different scan rate ( $\nu$ ) on dsDNA/Au/GR/CILE in pH 6.0 PBS (from a to l are 10, 40, 70, 100, 150, 200, 250, 300, 350, 400, 450, 500  $\text{mV s}^{-1}$ , respectively); (B) Linear relationship of the redox peak current ( $I_p$ ) versus  $\nu^{1/2}$ ; (C) Linear relationship between the redox peak potentials ( $E_p$ ) and  $\ln \nu$ .

Table S1 Influence of coexisting substances on the determination of  $1.0 \times 10^{-4}$  mol L<sup>-1</sup> DA (n=3)

| Coexisting substance | Concentration                            | Relative error (%) | Coexisting substance         | Concentration                            | Relative error (%) |
|----------------------|------------------------------------------|--------------------|------------------------------|------------------------------------------|--------------------|
| L-Glutamine          | 20.0 mg L <sup>-1</sup>                  | 1.66               | Ca <sup>2+</sup>             | $2.0 \times 10^{-5}$ mol L <sup>-1</sup> | -3.22              |
| L-Cysteine           | 20.0 mg L <sup>-1</sup>                  | 3.03               | Zn <sup>2+</sup>             | $2.0 \times 10^{-5}$ mol L <sup>-1</sup> | -2.23              |
| Citric acid          | 20.0 mg L <sup>-1</sup>                  | 1.56               | K <sup>+</sup>               | $2.0 \times 10^{-2}$ mol L <sup>-1</sup> | -1.74              |
| Glucose              | 20.0 mg L <sup>-1</sup>                  | -3.14              | Na <sup>+</sup>              | $2.0 \times 10^{-2}$ mol L <sup>-1</sup> | -2.16              |
| SDS                  | 20.0 mg L <sup>-1</sup>                  | -2.11              | NH <sub>4</sub> <sup>+</sup> | $2.0 \times 10^{-5}$ mol L <sup>-1</sup> | -3.54              |
| Fe <sup>2+</sup>     | $2.0 \times 10^{-5}$ mol L <sup>-1</sup> | -1.74              | NO <sub>3</sub> <sup>-</sup> | $2.0 \times 10^{-2}$ mol L <sup>-1</sup> | 2.19               |
| Mg <sup>2+</sup>     | $2.0 \times 10^{-5}$ mol L <sup>-1</sup> | -2.58              | Cl <sup>-</sup>              | $2.0 \times 10^{-2}$ mol L <sup>-1</sup> | 3.17               |

Table S2 Determination of DA in the injection samples (n = 6)

| Sample | Specified<br>( $\mu\text{mol L}^{-1}$ ) | Detected<br>( $\mu\text{mol L}^{-1}$ ) | Added<br>( $\mu\text{mol L}^{-1}$ ) | Total<br>( $\mu\text{mol L}^{-1}$ ) | RSD<br>(%) | Recover<br>(%) |
|--------|-----------------------------------------|----------------------------------------|-------------------------------------|-------------------------------------|------------|----------------|
| 1      | 63.28                                   | 64.52                                  | 20.0                                | 83.99                               | 1.96       | 97.4           |
| 2      | 63.28                                   | 63.23                                  | 40.0                                | 103.87                              | 1.89       | 101.6          |
| 3      | 63.28                                   | 62.86                                  | 60.0                                | 124.15                              | 2.02       | 102.2          |
